# Supplementary material
Source: PubMed Central journal article supplement (PMC4311887)
Supplement: NIHMS649267-supplement-3.pdf [file NIHMS649267-supplement-3.pdf]

## **Inventory of Supplemental Information**

Supplemental information document includes 5 Supplemental Figures related to the main Figures 2 to 7 and a 3D reconstitution movie (Movie S1) related to cartilage formation in the media of J1<sup>SMKO</sup> aorta. The document contains Supplemental Experimental procedures including primer sequences, antibodies used for immunostaining and for immunoblotting. An additional references section applying to the additional Experimental Procedures is also included.
